# Supplementary material for: Coumaroyl Flavonol Glycosides and More in Marketed Green Teas: An Intrinsic Value beyond Much-Lauded Catechins
Source: PubMed Central journal article supplement (PMC7221963; doi:10.3390/molecules25081765), 2020-04-11

Supplementary Material

# Coumaroyl Flavonol Glycosides and more in marketed green teas: an intrinsic value beyond much-lauded catechins

Lorenzo Candela, Marialuisa Formato, Giuseppina Crescente, Simona Piccolella, and Severina Pacifico\*

**Figure S1.** Total Ion Chromatograms (TICs) of alcoholic extracts ● TeaTWF; ● TeaGNP; ● TeaSNC; ● TeaBNC; ● TeaMTC; ● TeaCEC

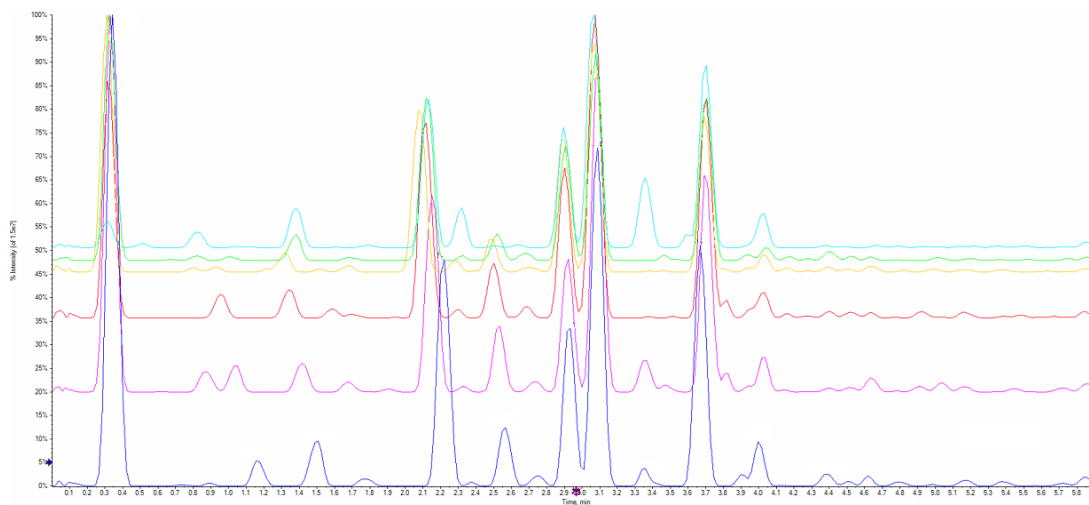

**Figure S2.** TOF-MS/MS spectra of deprotonated compound **1** (**A**), and  $[M+Cl]^-$  adducts of compounds **4** (**B**) and **5** (**C**). In D panel, the formation of the ion at  $m/z$  221 is proposed based on raffinose trihexose;  $m/z$  values, below each structure, are the calculated ones

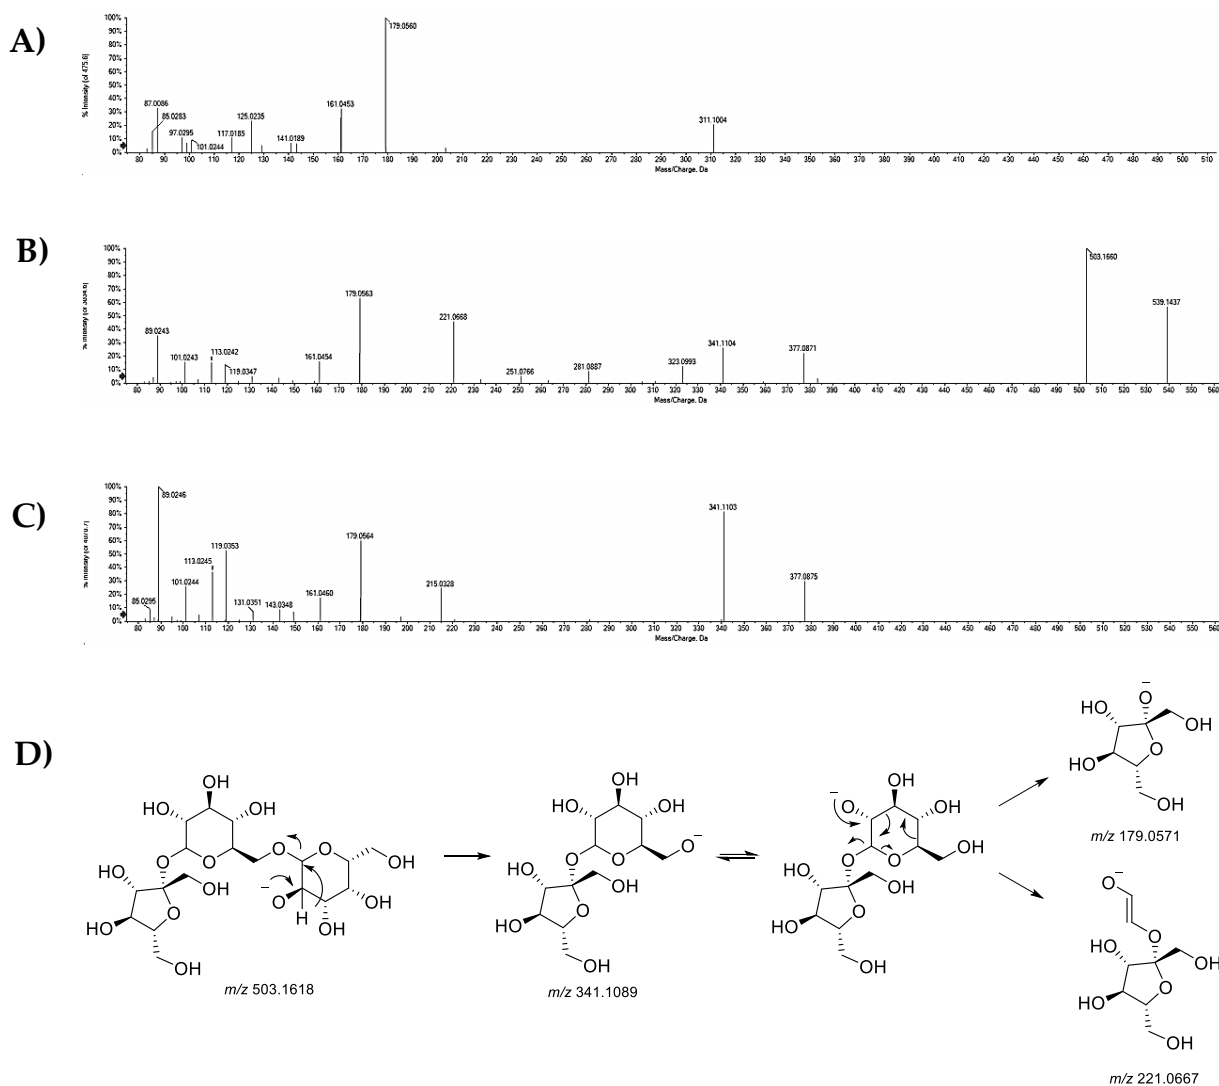

**Figure S3.** TOF-MS/MS spectra of  $[M-H]^-$  ion of compound **A) 8**, and **C) 10**. In panel B the fragmentation pattern that leads to the HRF-mediated formation of the fragment ion at  $m/z$  125.0244 (calcd) is exemplified (in blue), whereas RDA reaction gives the fragment ions at  $m/z$  137.0244 e 167.0350 (calcd). This latter fragment ion is diagnostic for gallo catechins and all the derivatives showing pyrogallol B-ring.

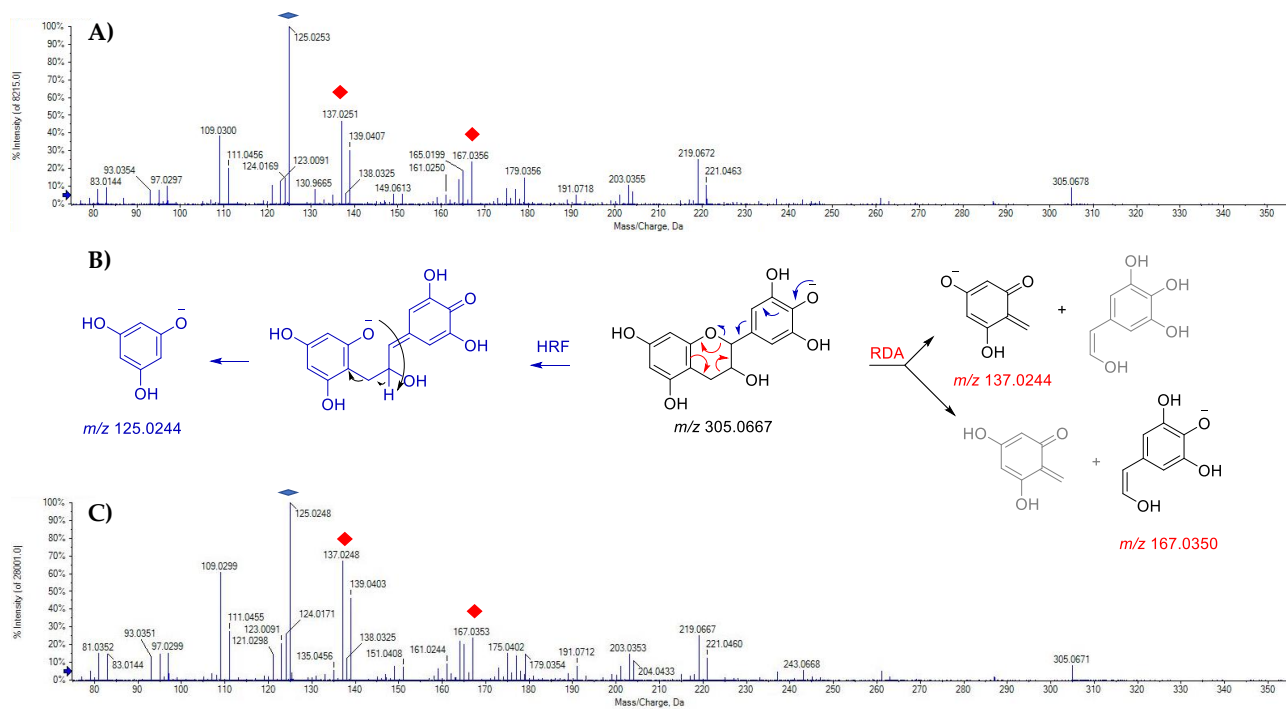

**Figure S4.** TOF-MS/MS spectra of [M-H]<sup>-</sup> ion of compound **A) 15**, and **B) 26**. The structure of the main fragment ions is highlighted; *m/z* values, below each structure, are the calculated ones.

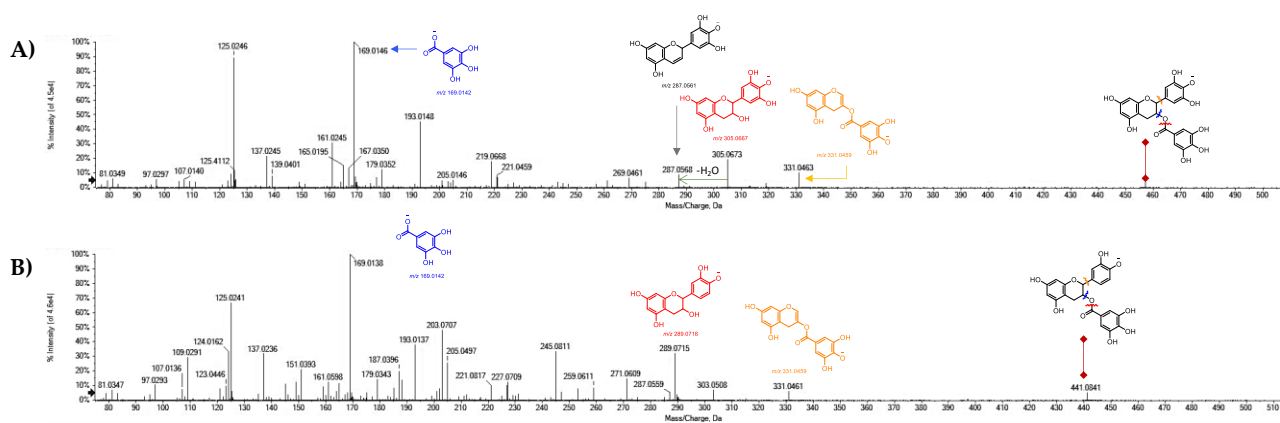

**Figure S5.** TOF-MS/MS spectrum of [M-H]<sup>-</sup> ion of compound **35**. The neutral loss of dehydrated gallic acid residue is highlighted; *m/z* values, below each structure, are the calculated ones.

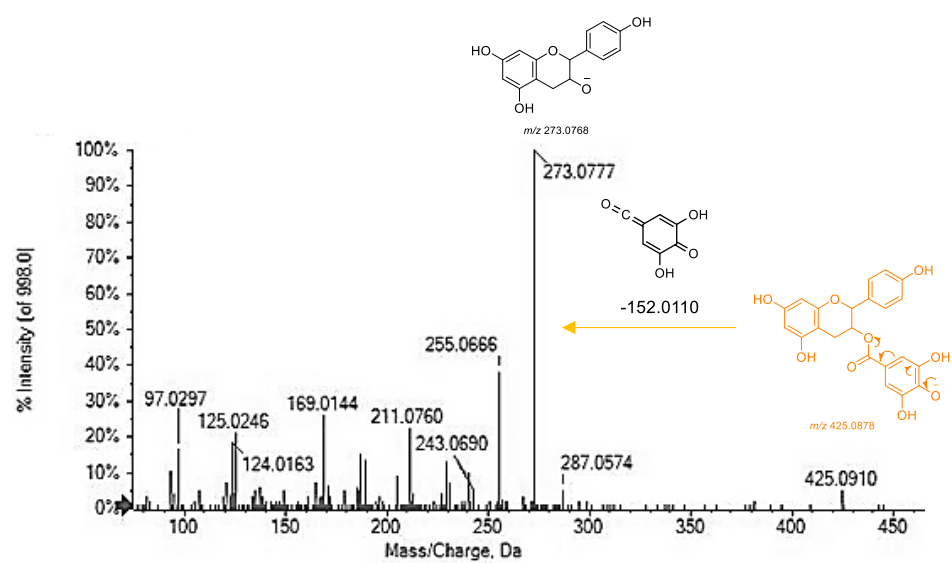

**Figure S6.** TOF-MS/MS spectra of [M-H]<sup>-</sup> ion of compound **A) 16**, and **B) 19**. The structures assigned to the compounds are reported in the grey panel.

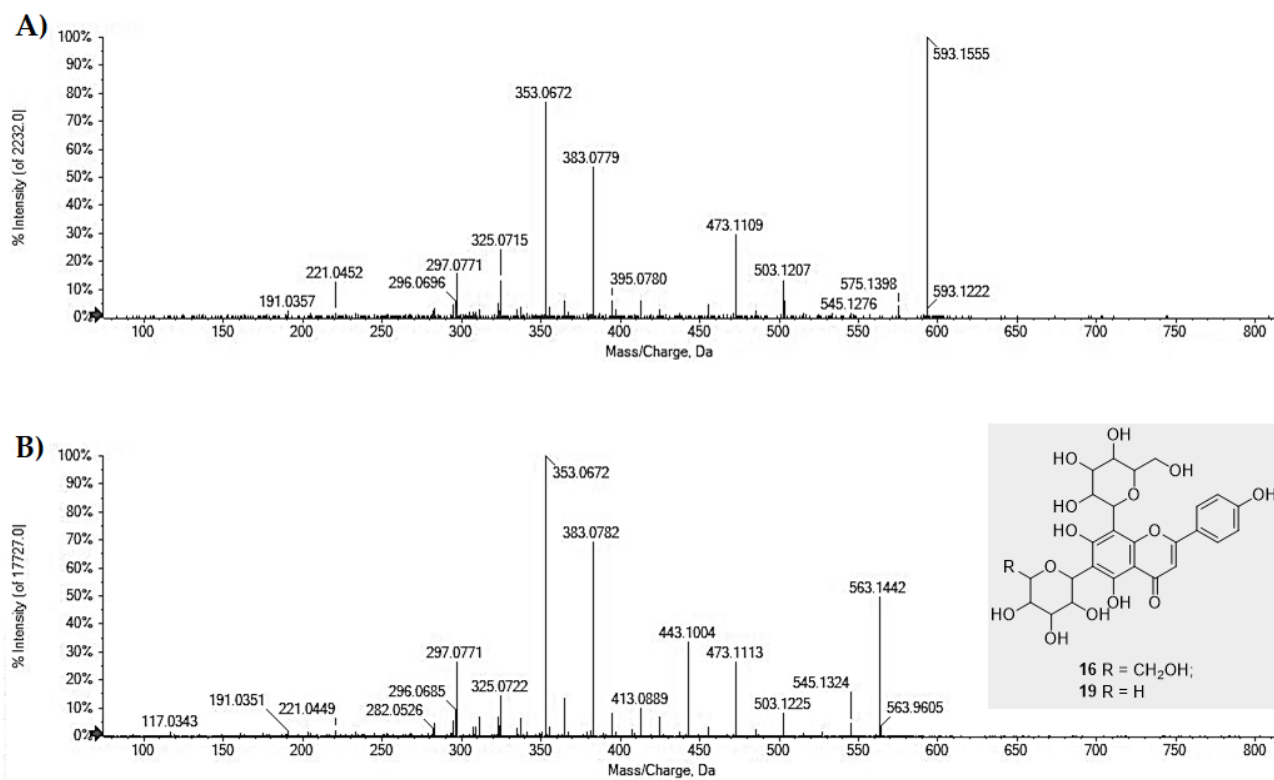

Supplement: molecules-25-01765-s001.pdf [file molecules-25-01765-s001.pdf]
